# Supplementary material for: CD1d-dependent rewiring of lipid metabolism in macrophages regulates innate immune responses
Source: Springer Nature journal article supplement (doi:10.1038/s41467-022-34532-x), 2022-11-07
Supplement: MOESM1 [file 41467_2022_34532_MOESM1_ESM.pdf]

## **SUPPLEMENTARY INFORMATION**

### **CD1d-dependent rewiring of lipid metabolism in macrophages regulates innate immune responses**

Phillip M. Brailey, Lauren Evans, Juan Carlos López-Rodríguez, Anthony Sinadinos, Victoria Tyrrel, Gavin Kelly, Valerie O'Donnell, Peter Ghazal, Susan John & Patricia Barral

This PDF file includes Supplementary Figures 1 to 6 and Supplementary Table 1

# Supplementary Figure 1

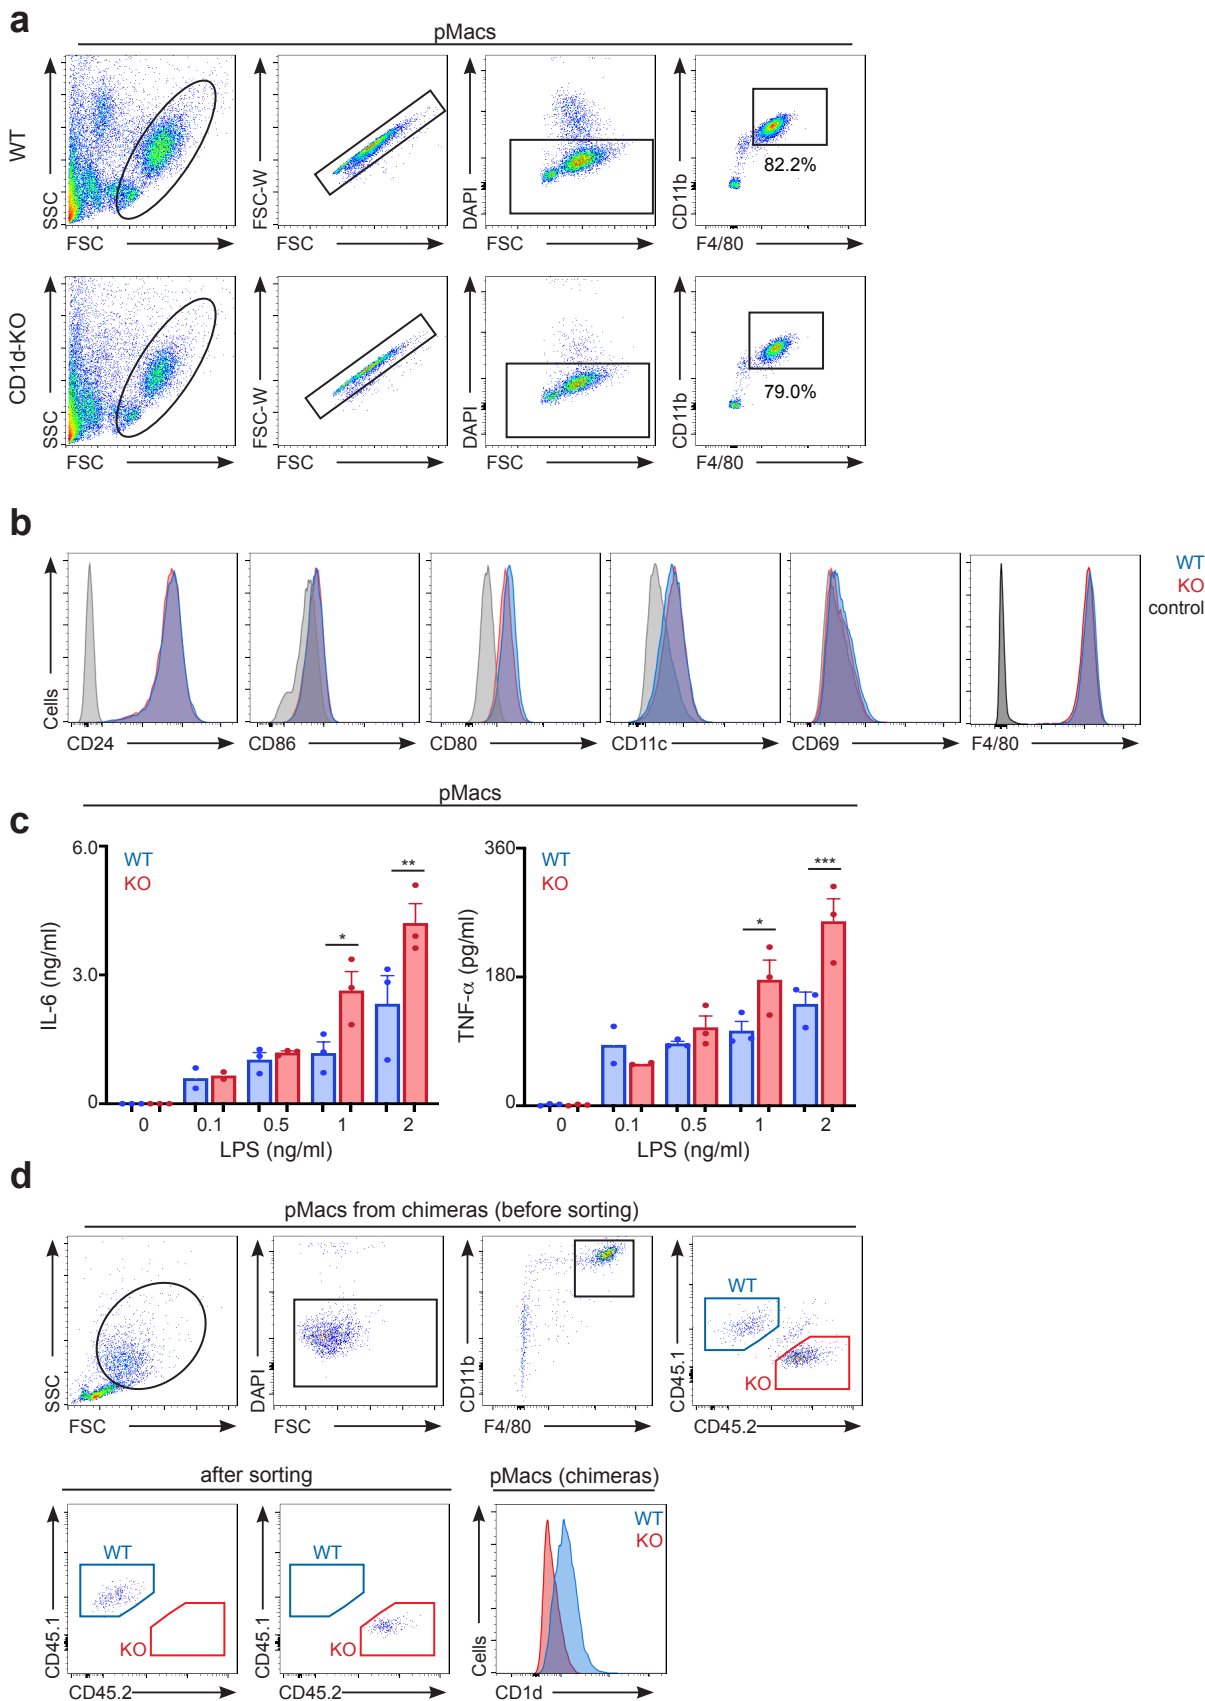

**Supplementary Figure 1. Characterization of WT and CD1d-KO pMacs.** (a) Flow cytometry profile showing populations of WT and CD1d-KO pMacs. (b) Representative flow cytometry for WT (blue) and CD1d-KO (red) pMacs showing expression of the depicted markers. (c) Secretion of IL-6 (left) and TNF- $\alpha$  (right) in WT and CD1d-KO pMacs stimulated with LPS at the indicated concentrations (n=2-3). Bars represent mean  $\pm$  SEM; \*p<0.05; \*\*p<0.01, \*\*\*p<0.001, 2-way ANOVA. (d) Flow cytometry profiles showing gating strategy for purification of WT and CD1d-KO pMacs from BM chimeras. Values for n represent biologically independent samples (as shown by the number of data points in each graph). n= cells isolated from individual mice. Source data are provided as a Source Data file

## Supplementary Figure 2

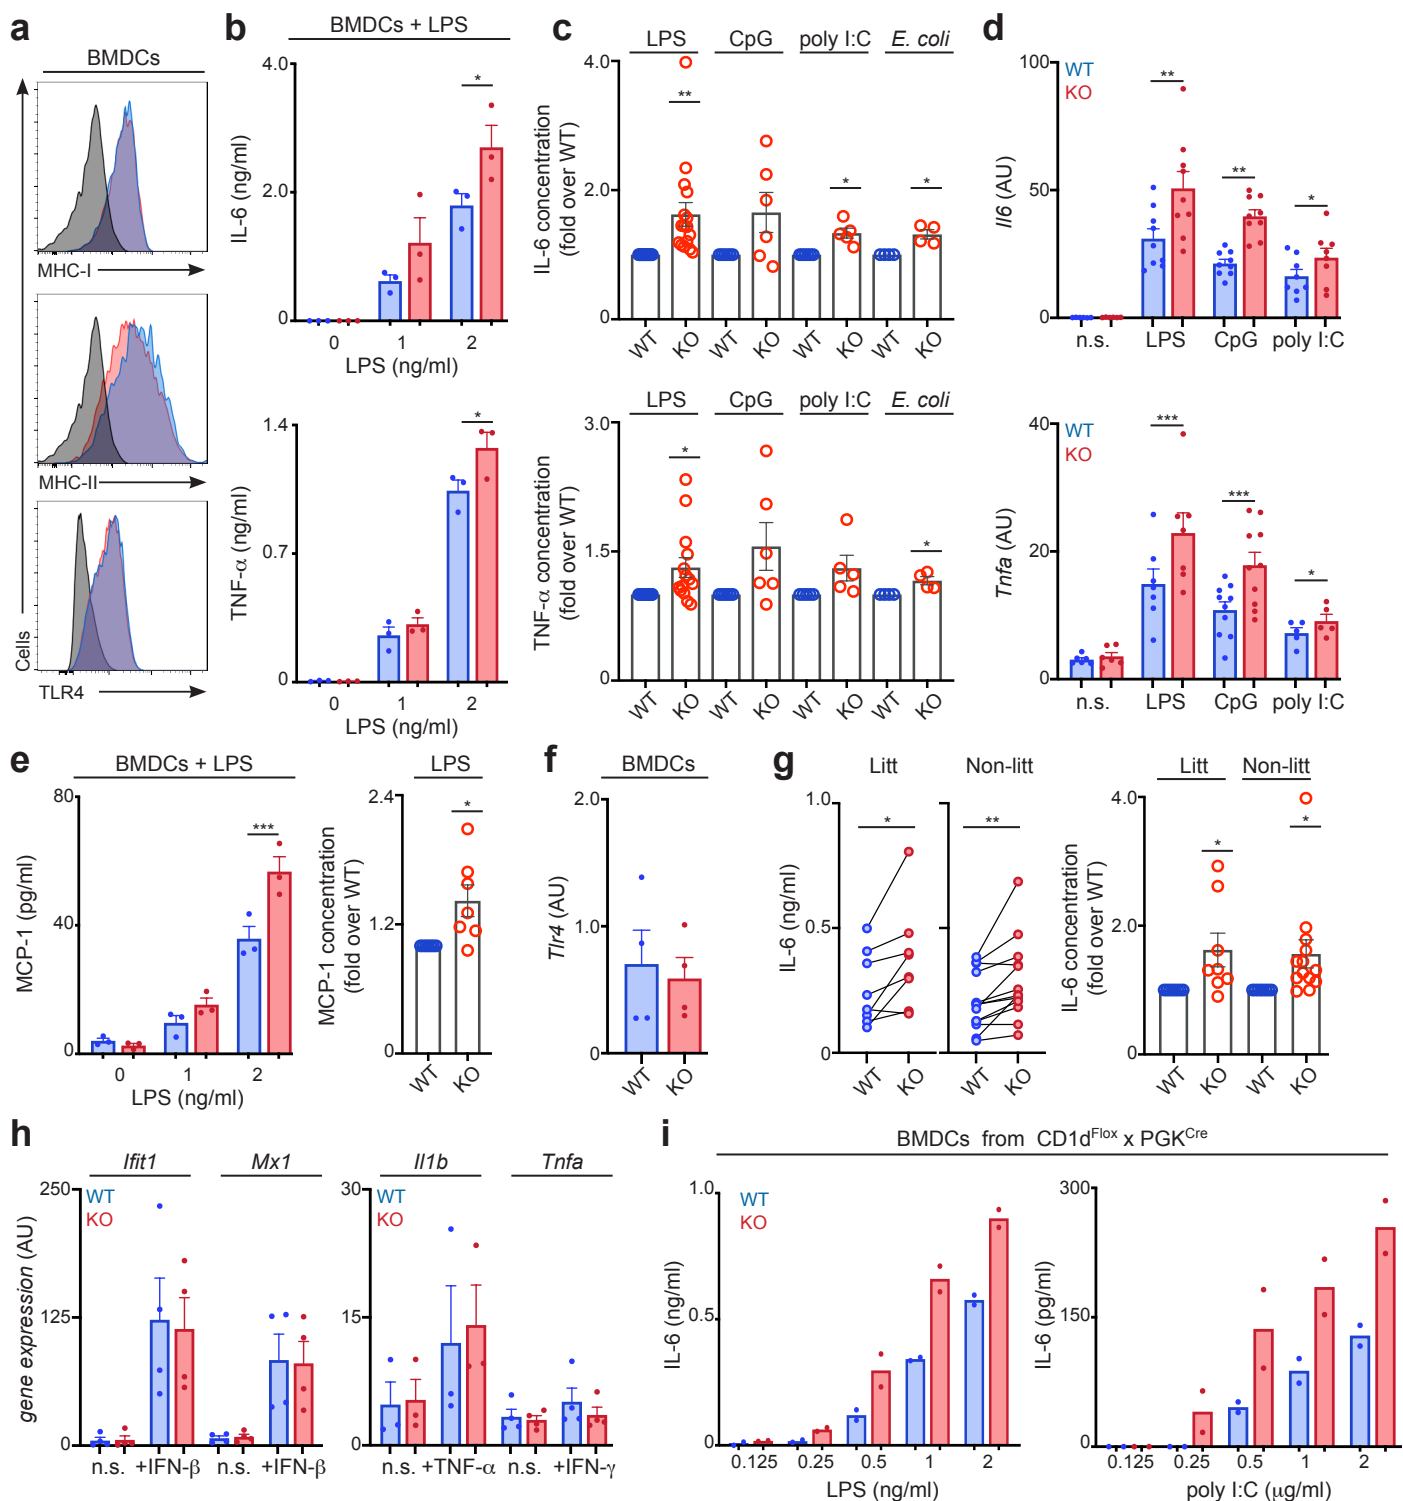

### Supplementary Figure 2. CD1d functions as a negative regulator of TLR responses

(a) Representative flow cytometry of WT (blue) and CD1d-KO (red) BMDCs. (b) Cytokine secretion by WT (blue) and CD1d-KO (red) BMDCs stimulated with LPS as indicated (n=3). \* $p < 0.05$ ; 2-way ANOVA. (c-d) Normalised concentration of secreted cytokines (fold over WT, c) and gene expression (d) in WT and CD1d-KO BMDCs cultured with the depicted stimuli for 6h (n=4-16). \* $p < 0.05$ ; \*\* $p < 0.01$ ; \*\*\* $p < 0.001$  one-sample (c) or paired two-tailed t-test (d). n.s.=non stimulated. (e) Secretion of MCP-1 (left, n=3) and normalised concentration of MCP-1 (fold over WT, right, n=7) for BMDCs after stimulation with LPS. \* $p < 0.05$ ; \*\*\* $p < 0.001$ ; 2-way ANOVA (left), or one-sample t-test (right). (f) qPCR expression data of *Tlr4* in WT and CD1d-KO BMDCs (n=4). (g) Secretion of IL-6 (left) and normalised concentration of IL-6 (fold over WT, right) for BMDCs after stimulation with LPS as above (n=8-13). Cells were either isolated from littermate controls (Litt) or from age and sex matched WT and CD1d-KO mice (Non-Litt). \* $p < 0.05$ ; \*\* $p < 0.01$ ; two-tailed paired (left) or one-sample t-test (right). (h) Expression of the depicted genes in WT and CD1d-KO BMDCs after stimulation with IFN- $\beta$ , TNF- $\alpha$  or IFN- $\gamma$  (n=4). n.s.=non stimulated. (i) WT or CD1d-KO BMDCs were generated from CD1d<sup>Flox</sup> x PGK<sup>Cre</sup> mice and stimulated with TLR ligands. IL-6 secretion was measured by ELISA. Data are representative results pooled from 2 experiments. Bars in all graphs represent mean  $\pm$  SEM. Values for n represent biologically independent samples (as shown by the number of data points in each graph). n= cells isolated from individual mice. Source data are provided as a Source Data file

# Supplementary Figure 3

| Down in KO          |                |          | Up in KO            |                |                |
|---------------------|----------------|----------|---------------------|----------------|----------------|
| id                  | log2FoldChange | symbol   | id                  | log2FoldChange | symbol         |
| ENSMUSG00000078377  | -29.02687683   |          | ENSMUSG00000020680  | 0.385143837    | Taf15          |
| ENSMUSG000000082141 | -25.51405833   |          | ENSMUSG000000061175 | 0.444649512    | Frip2          |
| ENSMUSG00000039252  | -25.17376208   | Lgi2     | ENSMUSG00000001751  | 0.471676243    | Naglu          |
| ENSMUSG000000065870 | -25.15593314   |          | ENSMUSG000000037260 | 0.486891168    | Hgsnat         |
| ENSMUSG000000101952 | -24.49460803   |          | ENSMUSG000000025453 | 0.530735068    | Nnt            |
| ENSMUSG000000096474 | -24.38033012   |          | ENSMUSG000000049866 | 0.537291735    | Arl4c          |
| ENSMUSG000000067736 | -23.19460402   |          | ENSMUSG000000055172 | 0.611361153    | C1ra           |
| ENSMUSG000000081911 | -22.4070127    |          | ENSMUSG000000028086 | 0.645631736    | Fbxw7          |
| ENSMUSG000000046952 | -21.80931864   |          | ENSMUSG000000038034 | 0.663384004    | Igsf8          |
| ENSMUSG000000045587 | -21.7572145    | BCD49730 | ENSMUSG00000004709  | 0.668737665    | Cd244          |
| ENSMUSG000000082087 | -21.50619188   |          | ENSMUSG000000044668 | 0.67018404     | Fam46c         |
| ENSMUSG000000092463 | -21.00054731   |          | ENSMUSG000000086503 | 0.670549626    | Xist           |
| ENSMUSG000000071141 | -20.16127284   |          | ENSMUSG000000024030 | 0.714374305    | Abcg1          |
| ENSMUSG000000068397 | -19.92045506   |          | ENSMUSG000000028015 | 0.731429996    | Ctso           |
| ENSMUSG000000084383 | -19.92045506   |          | ENSMUSG000000073643 | 0.736013728    | Wdfy1          |
| ENSMUSG000000030804 | -19.84615886   |          | ENSMUSG00000000958  | 0.737899591    | Sic7a7         |
| ENSMUSG000000053916 | -19.58641821   | Nanp     | ENSMUSG000000032204 | 0.740203525    | Aqp9           |
| ENSMUSG000000010136 | -19.53756849   | Pifo     | ENSMUSG000000025408 | 0.754618174    | Ddit3          |
| ENSMUSG000000094737 | -19.40188341   |          | ENSMUSG000000001281 | 0.765637973    | Itgb7          |
| ENSMUSG000000029419 | -19.35780074   | Gm996    | ENSMUSG000000023078 | 0.766462641    | Cxcl13         |
| ENSMUSG000000083274 | -19.28172668   |          | ENSMUSG000000032216 | 0.808795868    | Ned44          |
| ENSMUSG000000040666 | -19.19481094   | Sh3bgr   | ENSMUSG00000008734  | 0.861510092    | Gprc5b         |
| ENSMUSG00000105286  | -19.17992727   |          | ENSMUSG000000034271 | 0.888884445    | Jdp2           |
| ENSMUSG000000030546 | -19.15470464   | Plin1    | ENSMUSG000000028064 | 0.975414951    | Sema4a         |
| ENSMUSG000000110471 | -19.14782716   |          | ENSMUSG000000037443 | 0.97602546     | Cep85          |
| ENSMUSG000000085791 | -19.142776     |          | ENSMUSG000000032715 | 0.982518973    | Triab3         |
| ENSMUSG000000097060 | -19.13868066   |          | ENSMUSG000000031078 | 1.128483882    | Cttn           |
| ENSMUSG000000090707 | -19.12414804   |          | ENSMUSG00000004359  | 1.156690765    | Spic           |
| ENSMUSG000000037846 | -19.08291678   | Rtkn2    | ENSMUSG000000027313 | 1.183963175    | Chac1          |
| ENSMUSG000000068962 | -18.48410958   | Zfp114   | ENSMUSG000000027799 | 1.227967105    | Nbea           |
| ENSMUSG000000084241 | -18.47966166   |          | ENSMUSG000000024011 | 1.288366405    | Plf1           |
| ENSMUSG000000066007 | -18.47402191   | Zfp600   | ENSMUSG000000059994 | 1.292605881    | Fcrl1          |
| ENSMUSG000000049908 | -18.33106189   | Gja8     | ENSMUSG000000040690 | 1.32644391     | Col16a1        |
| ENSMUSG000000025272 | -18.32751133   | Tro      | ENSMUSG000000052477 | 1.32836733     | C1300262I21Rik |
| ENSMUSG000000081529 | -18.25436017   |          | ENSMUSG000000034205 | 1.362038476    | Loxl2          |
| ENSMUSG000000031876 | -18.23381501   |          | ENSMUSG000000027962 | 1.498433165    | Vcam1          |
| ENSMUSG000000045794 | -18.19147542   | Lkaaeer1 | ENSMUSG000000038085 | 1.622206448    | Cnbd2          |
| ENSMUSG000000092405 | -18.15286756   |          | ENSMUSG000000045573 | 1.660739418    | Penk           |
| ENSMUSG000000090785 | -18.02278912   |          | ENSMUSG000000079190 | 1.871276669    | LOC100041057   |
| ENSMUSG00000061742  | -18.01451198   | Sic22a12 | ENSMUSG000000105263 | 1.891233216    |                |
| ENSMUSG000000087951 | -18.01195064   |          | ENSMUSG000000105703 | 1.940420054    |                |
| ENSMUSG000000083038 | -18.01130463   |          | ENSMUSG000000056498 | 2.013178057    | Tmem154        |
| ENSMUSG000000092345 | -17.92963999   |          | ENSMUSG000000096979 | 2.56330811     |                |
| ENSMUSG000000083310 | -17.84500115   |          | ENSMUSG000000110386 | 3.068260462    |                |
| ENSMUSG000000093574 | -17.8365345    |          | ENSMUSG000000107379 | 4.018599416    |                |
| ENSMUSG000000066491 | -17.78414861   |          | ENSMUSG000000085847 | 5.160990991    |                |
| ENSMUSG000000035131 | -17.77972288   | Brinp3   | ENSMUSG000000062611 | 5.1763928      |                |
| ENSMUSG000000094271 | -17.68592972   | Gm13290  | ENSMUSG000000058126 | 5.25145588     |                |
| ENSMUSG000000087654 | -17.63237787   |          | ENSMUSG000000059751 | 7.594289745    |                |
| ENSMUSG000000104608 | -17.55753549   |          | ENSMUSG000000060795 | 15.19528034    |                |
| ENSMUSG000000064194 | -17.52080742   | Zfp936   | ENSMUSG000000052469 | 15.22625097    | Tcp10c         |
| ENSMUSG000000105835 | -17.47650905   |          | ENSMUSG000000059146 | 15.480202007   | Ntrk3          |
| ENSMUSG000000042874 | -17.38238539   |          | ENSMUSG000000099913 | 16.01724418    |                |
| ENSMUSG000000084836 | -17.36237998   |          | ENSMUSG000000034362 | 16.10432819    | Csta1          |
| ENSMUSG000000089621 | -17.33463081   |          | ENSMUSG000000039814 | 16.18389028    | Xkr5           |
| ENSMUSG000000101867 | -17.31038224   |          | ENSMUSG000000081078 | 16.38075379    |                |
| ENSMUSG000000106090 | -17.30617168   |          | ENSMUSG000000073130 | 16.6843199     | Gm1141         |
| ENSMUSG000000101459 | -17.30611952   |          | ENSMUSG000000061833 | 16.72269645    |                |
| ENSMUSG000000092232 | -17.2858375    |          | ENSMUSG000000101645 | 16.99566079    | Ctnnd1         |
| ENSMUSG000000065406 | -17.27267003   | Mirlet7i | ENSMUSG000000091898 | 17.0054444     | Tnnc1          |
| ENSMUSG000000082318 | -17.23789548   |          | ENSMUSG000000026220 | 17.00664001    | Sic16a14       |
| ENSMUSG000000092389 | -17.2374632    |          | ENSMUSG000000096718 | 17.02526929    | Zfp781         |
| ENSMUSG000000061626 | -17.23761333   | Olfir68  | ENSMUSG000000105820 | 17.3691121     |                |
| ENSMUSG000000093720 | -17.22543197   |          | ENSMUSG000000092283 | 17.43077974    |                |
| ENSMUSG000000057766 | -17.2004269    | Ankrd29  | ENSMUSG000000031283 | 17.501563      | Chrd1          |
| ENSMUSG000000032023 | -17.11337011   | Jhy      | ENSMUSG000000080374 | 17.74496542    |                |
| ENSMUSG000000086384 | -17.081537     |          | ENSMUSG000000101397 | 17.79153262    | Mug-ps1        |
| ENSMUSG000000092760 | -17.05429563   |          | ENSMUSG000000095937 | 17.89871939    |                |
| ENSMUSG000000086827 | -17.02719809   |          | ENSMUSG000000049555 | 18.09021599    | Tmie           |
| ENSMUSG000000050425 | -17.02713507   | Mrgprb2  | ENSMUSG000000080977 | 18.09372441    |                |
| ENSMUSG000000083708 | -16.66318016   |          | ENSMUSG000000092029 | 18.26756917    |                |
| ENSMUSG000000040473 | -16.46604263   | Cfap69   | ENSMUSG000000096805 | 18.68315867    |                |
| ENSMUSG000000082195 | -16.00229883   |          | ENSMUSG000000082718 | 19.59083141    |                |
| ENSMUSG000000078963 | -16.00091701   | Hsbp11   | ENSMUSG000000096712 | 20.18197979    |                |
| ENSMUSG000000077709 | -15.50324552   | Snora64  | ENSMUSG000000047643 | 20.35459859    |                |
| ENSMUSG000000028076 | -5.502108487   | Cdtd1    | ENSMUSG000000094421 | 20.36414539    |                |
| ENSMUSG000000063458 | -1.742529128   | Lrmda    | ENSMUSG000000053830 | 22.8410883     |                |
| ENSMUSG000000028081 | -1.638195772   | Rps3a1   | ENSMUSG000000104953 | 23.54925218    |                |
| ENSMUSG00000004891  | -1.339610277   | Nes      | ENSMUSG000000096617 | 23.9668179     |                |
| ENSMUSG000000025150 | -1.226347434   | Cbr2     |                     |                |                |
| ENSMUSG000000015568 | -1.20797248    | Lpl      |                     |                |                |
| ENSMUSG000000032725 | -1.097863983   | Folr2    |                     |                |                |
| ENSMUSG000000026675 | -1.026861817   | Hsd17b7  |                     |                |                |
| ENSMUSG000000021508 | -0.851529888   | Cxcl14   |                     |                |                |
| ENSMUSG000000000489 | -0.792243357   | Pdgfb    |                     |                |                |
| ENSMUSG000000031373 | -0.77861091    | Car5b    |                     |                |                |
| ENSMUSG000000066632 | -0.772226994   |          |                     |                |                |
| ENSMUSG000000032786 | -0.767240341   | Alas1    |                     |                |                |
| ENSMUSG000000032561 | -0.709662034   | Acpp     |                     |                |                |
| ENSMUSG000000027940 | -0.695303653   | Tpm3     |                     |                |                |
| ENSMUSG000000019302 | -0.682497034   | Atp6v0a1 |                     |                |                |
| ENSMUSG000000098557 | -0.670531542   | Kctd12   |                     |                |                |
| ENSMUSG000000002992 | -0.659858141   | Apoc2    |                     |                |                |
| ENSMUSG000000038540 | -0.646951734   | Tmc3     |                     |                |                |
| ENSMUSG000000058258 | -0.634808577   | Idi1     |                     |                |                |
| ENSMUSG000000017754 | -0.63377792    | Pltp     |                     |                |                |
| ENSMUSG000000059743 | -0.597290601   | Fdps     |                     |                |                |
| ENSMUSG000000037536 | -0.58241735    | Fbxo34   |                     |                |                |
| ENSMUSG000000031827 | -0.581882905   | Cotl1    |                     |                |                |
| ENSMUSG000000037868 | -0.569863422   | Egr2     |                     |                |                |
| ENSMUSG00000001467  | -0.565282341   | Cyp51    |                     |                |                |
| ENSMUSG000000079293 | -0.516240515   | Clec7a   |                     |                |                |
| ENSMUSG000000093930 | -0.483777701   | Hmgcs1   |                     |                |                |
| ENSMUSG000000032018 | -0.483071462   | Sc5d     |                     |                |                |
| ENSMUSG000000028691 | -0.476256898   | Prdx1    |                     |                |                |
| ENSMUSG000000021273 | -0.448175672   | Fdft1    |                     |                |                |
| ENSMUSG000000031604 | -0.446118195   | Msmo1    |                     |                |                |
| ENSMUSG000000040451 | -0.444125925   | Sgms1    |                     |                |                |
| ENSMUSG000000032462 | -0.40813545    | Plk3cb   |                     |                |                |
| ENSMUSG000000045294 | -0.379533015   | Insig1   |                     |                |                |

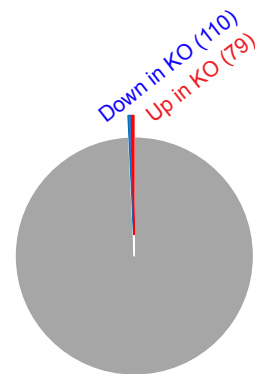

| GO Biological process                         |  |
|-----------------------------------------------|--|
| Genes                                         |  |
| Msmo1                                         |  |
| Cyp51                                         |  |
| Fdft1                                         |  |
| Hsd17b7                                       |  |
| Sc5d                                          |  |
| Idi1                                          |  |
| Hmgcs1                                        |  |
| Fdps                                          |  |
| Abcg1                                         |  |
| Pltp                                          |  |
| Apoc2                                         |  |
| Lpl                                           |  |
| Insig                                         |  |
| Cd244                                         |  |
| Triab3                                        |  |
| Sgms1                                         |  |
| Plk3cb                                        |  |
| Nanp                                          |  |
| Pdgfb                                         |  |
| cholesterol biosynthetic process              |  |
| secondary alcohol biosynthetic process        |  |
| sterol biosynthetic process                   |  |
| cholesterol metabolic process                 |  |
| sterol metabolic process                      |  |
| secondary alcohol metabolic process           |  |
| alcohol biosynthetic process                  |  |
| steroid biosynthetic process                  |  |
| organic hydroxy compound biosynthetic process |  |
| lipid biosynthetic process                    |  |
| sterol metabolic process                      |  |
| farnesyl diphosphate metabolic process        |  |
| alcohol metabolic process                     |  |
| small molecule biosynthetic process           |  |
| isoprenoid biosynthetic process               |  |
| organic hydroxy compound metabolic process    |  |

**Supplementary Figure 3. Differentially expressed genes in CD1d-KO vs. WT pMacs.** Left table show genes ID and symbols as well as the fold change for differentially expressed genes between WT and KO pMacs. A fold change cut-off of 1.5 and adjusted p-value cut off of 0.01 were applied. Top right, show numbers of significantly up- or down-regulated genes. Right table shows GO terms and input genes for significantly changed pathways.

## Supplementary Figure 4

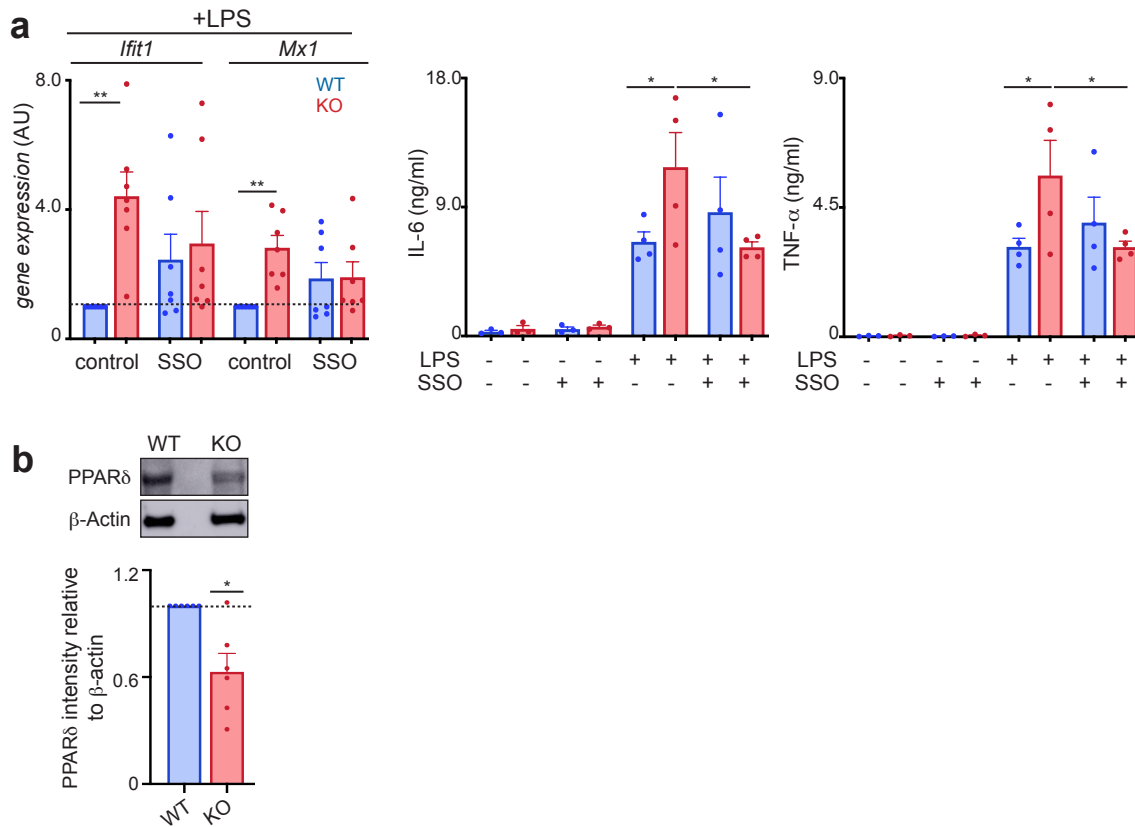

**Supplementary Figure 4. CD1d links metabolism and immunity in macrophages. (a)** BMDCs were cultured in the presence (or absence, control) of SSO overnight prior to stimulation with LPS. Expression of the depicted genes (left,  $n=7$ ) or cytokine secretion (right,  $n=3-4$ ) are shown. Bars represent mean  $\pm$  SEM; \* $p<0.05$ ; \*\* $p<0.01$  2-way ANOVA. **(b)** Western-blot showing total PPAR $\delta$  and  $\beta$ -actin in WT and CD1d-KO BMDCs. Levels of PPAR $\delta$  were quantified and related to  $\beta$ -actin ( $n=6$ ). Bars represent mean  $\pm$  SEM; \* $p<0.05$  one-sample t-test. Values for  $n$  represent biologically independent samples (as shown by the number of data points in each graph).  $n$ = cells isolated from individual mice. Source data are provided as a Source Data file

## Supplementary Figure 5

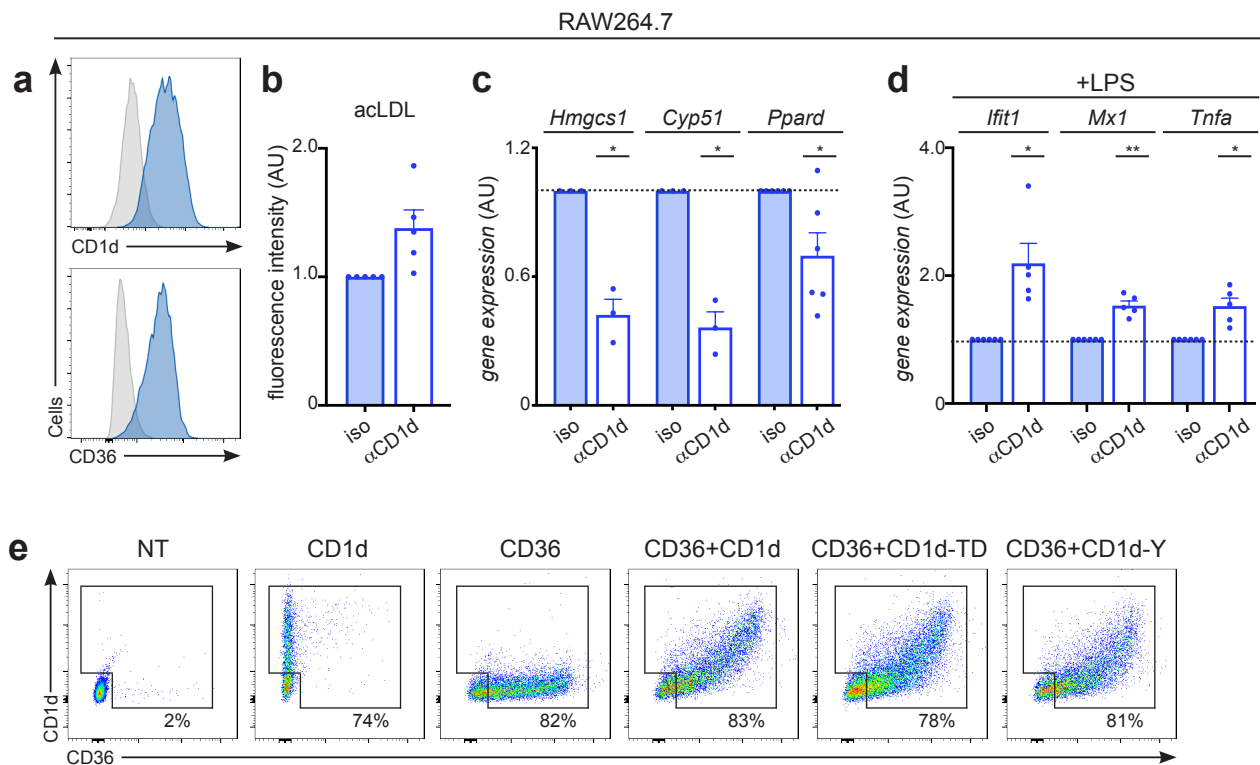

**Supplementary Figure 5. CD1d regulates CD36-dependent lipid uptake.** (a-d) RAW264.7 cells were treated with  $\alpha$ CD1d antibody or isotype control (iso) as indicated. (a) Flow cytometry panel showing expression of CD1d and CD36; (b) Uptake of Dil-acLDL (n=5); (c) Relative expression of the depicted genes (n=3-6); (d) Expression of the depicted genes after LPS stimulation (n=5). Bars represent mean  $\pm$  SEM; \*p<0.05, \*\*p<0.01 one-sample t-test. (e) HEK293T cells were transiently transfected with the indicated constructs to express CD1d, mutant CD1d (CD1d-TD or CD1d-Y) and/or CD36. Surface expression of CD1d and CD36 was measured by flow cytometry. Values for n represent biologically independent samples (as shown by the number of data points in each graph). Source data are provided as a Source Data file

## Supplementary Figure 6

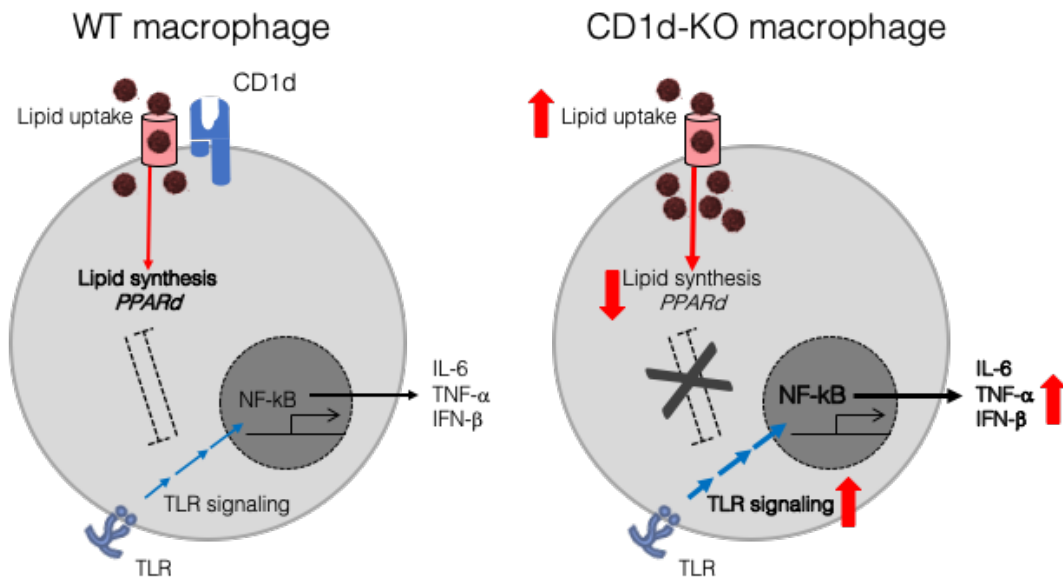

**Supplementary Figure 6. Schematic model of the CD1d-dependent regulation of metabolism and immunity in macrophages.** CD1d-deficient macrophages display an increased lipid uptake and transcriptional downregulation of metabolic enzymes involved in lipid synthesis pathways as well as the transcription factor PPAR $\delta$ . These metabolic alterations underpin increased responses of CD1d-KO cells to TLR stimulation, resulting in increased TLR signalling and cytokine production. Red arrows represent pathways up- or down-regulated in CD1d-KO cells vs. WT controls.

**Supplementary Table 1. Primers used for qPCR**

| <b>Target</b>  | <b>Forward Sequence</b>  | <b>Reverse Sequence</b>  |
|----------------|--------------------------|--------------------------|
| <i>Cd36</i>    | ATGGGCTGTGATCGGAACTG     | TTTGCCACGTCATCTGGGTTT    |
| <i>Cyp51a1</i> | CTGCCCGCTGGAGCGAAAAG     | CACAGGTGTTGTCAGCCGACC    |
| <i>Gapdh</i>   | AACGACCCCTTCATTGAC       | TCCACGACATACTCAGCA       |
| <i>Hmgcs1</i>  | GGAAGCCTTTGGGGACGTTA     | ACACTCCAACCCTCTTCCCT     |
| <i>Ifit1</i>   | CTGAGATGTCACTTCACATGGAA  | GTGCATCCCAATGGGTTCT      |
| <i>Il6</i>     | CAGAGGATACCACTCCCAACA    | TCCAGTTTGGTAGCATCCATC    |
| <i>Lpl</i>     | GGGAGTTTGGCTCCAGAGTTT    | TGTGTCTTCAGGGGTCCTTAG    |
| <i>Msra</i>    | TGGAGGAGAGAATCGAAAGCA    | CTGGACTGACGAAATCAAGGAA   |
| <i>Mx1</i>     | GACCATAGGGGTCTTGACCAA    | AGACTTGCTCTTTCTGAAAAGCC  |
| <i>Nrlh3</i>   | CTGATTCTGCAACGGAGTTGT    | GACGAAGCTCTGTTCGGCTC     |
| <i>Nrlh2</i>   | CCACCATCGAGATCATGTTG     | TCTCGTGGTTGTAGCGTCTGG    |
| <i>Plin1</i>   | GGGACCTGTGAGTGCTTCC      | GTATTGAAGAGCCGGGATCTTTT  |
| <i>Pltp</i>    | CGCAAAGGGCCACTTTTACTA    | GCCCCATCATATAAGAACCAG    |
| <i>Ppara</i>   | ACTCCACCTGCAGAGCAACCA    | TAFATCTCCTGCAGTAGCGGG    |
| <i>Ppard</i>   | CCCTGGCAAAGCATTGTAT      | AATCCTTGGCCCTCTGAGAT     |
| <i>Pparg</i>   | TTGAGCCCAAGTTCGAGTTTGCTG | ATTCTAGAGCCCGCAGAATGGTGT |
| <i>Srebf1</i>  | ACAGTGACTTCCCTGGCCTAT    | GCATGGACGGGTACATCTTCAA   |
| <i>Srebf2</i>  | GCAGCAACGGGACCATTCT      | CCCCATGACTAAGTCCTTCAACT  |
| <i>Tlr4</i>    | TGGCTGGTTTACACATCCATCGGT | TGGCACCATTGAAGCTGAGGTCTA |
